# Supplementary material
Source: Springer Nature journal article supplement (https://www.springermedizin.de/resource/supplementary/12986_2011_352_MOESM5_ESM.pdf/25655900)

### Glucose

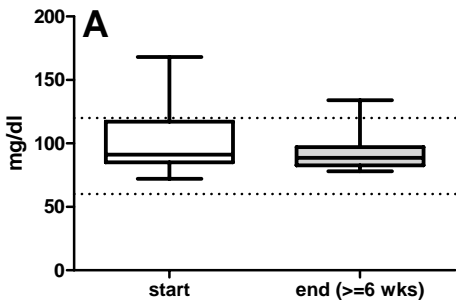

### Creatinine

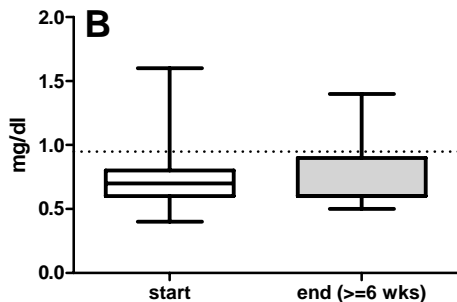

### Albumin

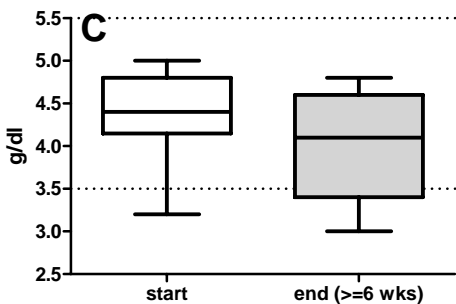

### Triglycerides

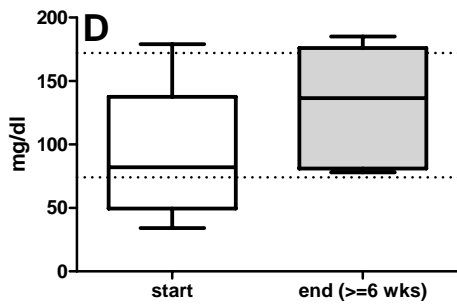

### Leucocytes

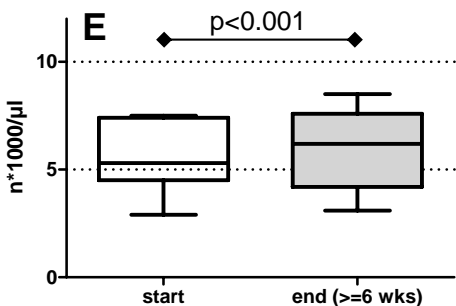

### Cholesterol

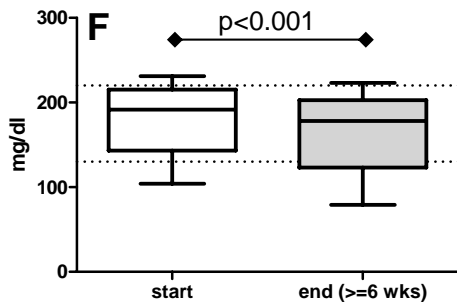

### LDL

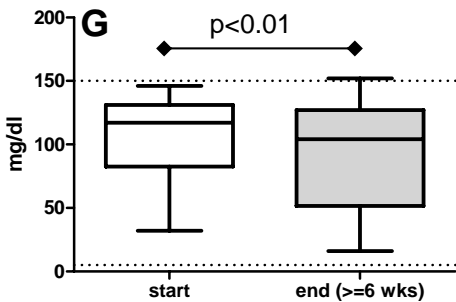

### LDL/HDL

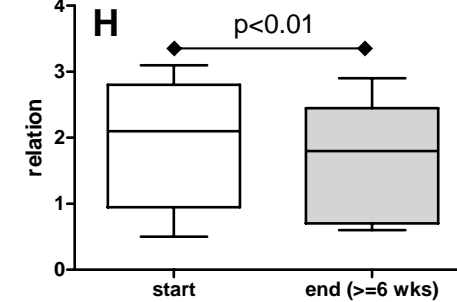

### ALT

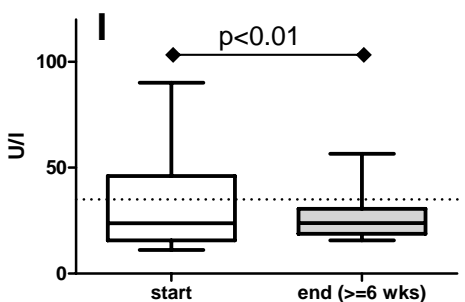

### Blood urea

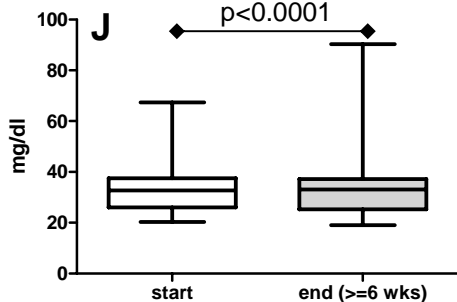

Supplement: MOESM5 [file 25655900]
